# Supplementary material for: In-Situ Sludge Reduction Performance and Mechanism in Sulfidogenic Anoxic–Oxic–Anoxic Membrane Bioreactors
Source: MDPI journal article supplement (doi:10.3390/membranes12090865), 2022-09-08
Supplement: s1 [file s1]

# **In-Situ Sludge Reduction Performance and Mechanism in Sulfidogenic Anoxic–Oxic–Anoxic Membrane Bioreactors**

**Chengyue Li** <sup>1,2,3,†</sup>, **Tahir Maqbool** <sup>1,2,3,†</sup>, **Hongyu Kang** <sup>1,2,3</sup> and **Zhenghua Zhang** <sup>1,2,3,\*</sup>

<sup>1</sup> Institute of Environmental Engineering & Nano-Technology, Tsinghua Shenzhen International Graduate School, Tsinghua University, Shenzhen 518055, China

<sup>2</sup> Guangdong Provincial Engineering Research Centre for Urban Water Recycling and Environmental Safety, Tsinghua Shenzhen International Graduate School, Tsinghua University, Shenzhen 518055, China

<sup>3</sup> School of Environment, Tsinghua University, Beijing 100084, China

\* Correspondence: zhenghua.zhang@sz.tsinghua.edu.cn

† These authors contributed equally to this work.

## **Text S1. PARAFAC modeling**

The fluorescence spectrometer (F-7000, Hitachi, Tokyo, Japan) was used to determine the three-dimensional excitation-emission matrix (EEM) of the fluorescent organic components in SMP and EPS in each tank of three bioreactors. The operational parameters were set according to Maqbool et al. [1]. Excitation-emission matrix-parallel factor (EEM-PARAFAC) analysis was introduced to elucidate the fluorescence peaks of different compounds [2]. A dataset contained 420 EEMs of SMP and EPS from three bioreactors was used for PARAFAC modeling. A free DOMFlour toolbox of Matlab was used and the detailed analysis procedures could be found elsewhere [3]. The maximum fluorescence intensities ( $F_{\max}$ ) of individual components were in direct proportion to their relative concentrations [4].

**Table S1.** Chemical composition of synthetic wastewater.

| Components                           | Concentration (mg/L)                |                                     |
|--------------------------------------|-------------------------------------|-------------------------------------|
|                                      | Control                             | AOA                                 |
| Glucose                              | 1000                                | 1185                                |
| NH <sub>4</sub> Cl                   | 140                                 | 165.9                               |
| KH <sub>2</sub> PO <sub>4</sub>      | 25                                  | 29.63                               |
| NaNO <sub>3</sub>                    | 40                                  | 47.4                                |
| MgSO <sub>4</sub> ·7H <sub>2</sub> O | 5                                   | 5.93                                |
| FeCl <sub>3</sub>                    | 2.33                                | 2.76                                |
| NaHCO <sub>3</sub>                   | Appropriate to maintain<br>pH = 7.0 | Appropriate to maintain<br>pH = 7.0 |

**Table S2.** The average  $\pm$  standard deviation of basic quality parameters of influent and effluent in three bioreactors.

| Items | Influent (mg/L)        |                   | Effluent (mg/L)        |                     |                     | Removal Efficiency (%) |                     |                     |
|-------|------------------------|-------------------|------------------------|---------------------|---------------------|------------------------|---------------------|---------------------|
|       | MBR <sub>control</sub> | AOA               | MBR <sub>control</sub> | AOA <sub>S150</sub> | AOA <sub>S300</sub> | MBR <sub>control</sub> | AOA <sub>S150</sub> | AOA <sub>S300</sub> |
| TOC   | 389.98 $\pm$ 5.94      | 441.2 $\pm$ 10.64 | 3.62 $\pm$ 0.48        | 4.87 $\pm$ 1.55     | 4.8 $\pm$ 1.56      | > 99                   | > 98                | > 98                |
| TN    | 45.20 $\pm$ 2.72       | 52.88 $\pm$ 6.30  | 8.49 $\pm$ 3.27        | 2.82 $\pm$ 1.17     | 3.59 $\pm$ 1.76     | > 81                   | > 94                | >93                 |
| TP    | 6.13 $\pm$ 0.07        | 7.34 $\pm$ 0.19   | 1.16 $\pm$ 0.56        | 1.70 $\pm$ 0.49     | 1.60 $\pm$ 0.57     | > 81                   | > 76                | > 78                |

**Table S3.** Sequencing of bacterial 16S rRNA gene along with alpha diversity of microbial taxa in three bioreactors.

| Sample description                           | Sequencing results |      | Species diversity |
|----------------------------------------------|--------------------|------|-------------------|
|                                              | Effective tags     | OTUs | Simpson           |
| MBR <sub>control</sub> -A-1d-a <sub>1</sub>  | 56402              | 1720 | 0.018             |
| MBR <sub>control</sub> -O-1d-o <sub>1</sub>  | 65627              | 1449 | 0.11              |
| MBR <sub>control</sub> -M-1d-m <sub>1</sub>  | 58914              | 1520 | 0.116             |
| MBR <sub>control</sub> -A-45d-a <sub>2</sub> | 58448              | 1627 | 0.057             |
| MBR <sub>control</sub> -O-45d-o <sub>2</sub> | 67622              | 1489 | 0.0694            |
| MBR <sub>control</sub> -M-45d-m <sub>2</sub> | 56745              | 1268 | 0.0544            |
| MBR <sub>control</sub> -A-90d-a <sub>3</sub> | 61203              | 1232 | 0.133             |
| MBR <sub>control</sub> -O-90d-o <sub>3</sub> | 59066              | 1225 | 0.114             |
| MBR <sub>control</sub> -M-90d-m <sub>3</sub> | 61120              | 1258 | 0.115             |
| AOA <sub>S150</sub> -A-1d-a <sub>4</sub>     | 59282              | 1395 | 0.064             |
| AOA <sub>S150</sub> -O-1d-o <sub>4</sub>     | 63154              | 1195 | 0.0953            |
| AOA <sub>S150</sub> -M-1d-m <sub>4</sub>     | 60434              | 1370 | 0.0596            |
| AOA <sub>S150</sub> -A-45d-a <sub>5</sub>    | 63338              | 1080 | 0.18              |
| AOA <sub>S150</sub> -O-45d-o <sub>5</sub>    | 68505              | 1039 | 0.29              |
| AOA <sub>S150</sub> -M-45d-m <sub>5</sub>    | 64844              | 1194 | 0.211             |
| AOA <sub>S150</sub> -A-90d-a <sub>6</sub>    | 50333              | 1236 | 0.0588            |
| AOA <sub>S150</sub> -O-90d-o <sub>6</sub>    | 61612              | 1185 | 0.0836            |
| AOA <sub>S150</sub> -M-90d-m <sub>6</sub>    | 62850              | 1186 | 0.0913            |
| AOA <sub>S300</sub> -A-1d-a <sub>7</sub>     | 58914              | 1520 | 0.094             |
| AOA <sub>S300</sub> -O-1d-o <sub>7</sub>     | 59902              | 1288 | 0.0568            |
| AOA <sub>S300</sub> -M-1d-m <sub>7</sub>     | 59713              | 1575 | 0.0472            |
| AOA <sub>S300</sub> -A-45d-a <sub>8</sub>    | 56745              | 1268 | 0.0784            |
| AOA <sub>S300</sub> -O-45d-o <sub>8</sub>    | 68153              | 1121 | 0.0924            |
| AOA <sub>S300</sub> -M-45d-m <sub>8</sub>    | 58512              | 1169 | 0.12              |
| AOA <sub>S300</sub> -A-90d-a <sub>9</sub>    | 61120              | 1258 | 0.11              |
| AOA <sub>S300</sub> -O-90d-o <sub>9</sub>    | 57553              | 1240 | 0.115             |
| AOA <sub>S300</sub> -M-90d-m <sub>9</sub>    | 58938              | 1132 | 0.123             |

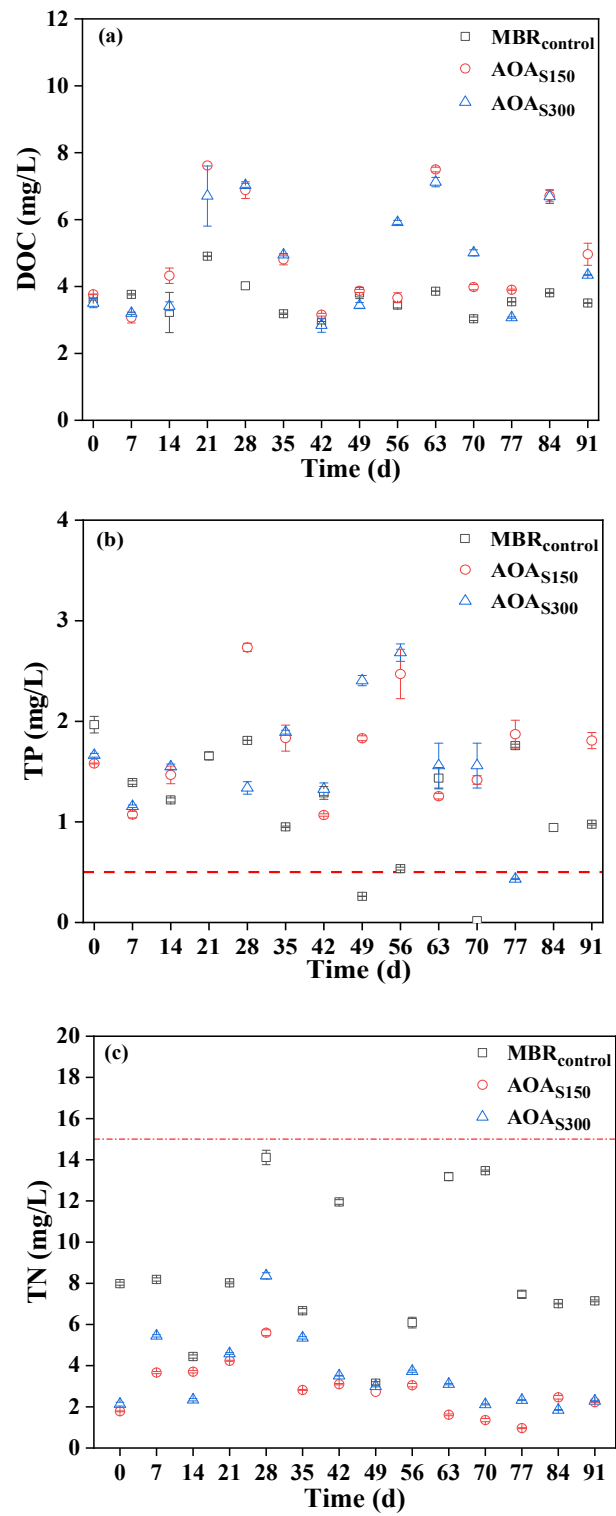

**Figure S1.** The temporal variations in basic quality parameters (a) DOC, (b) TN, and (c) TP in effluents from three bioreactors.

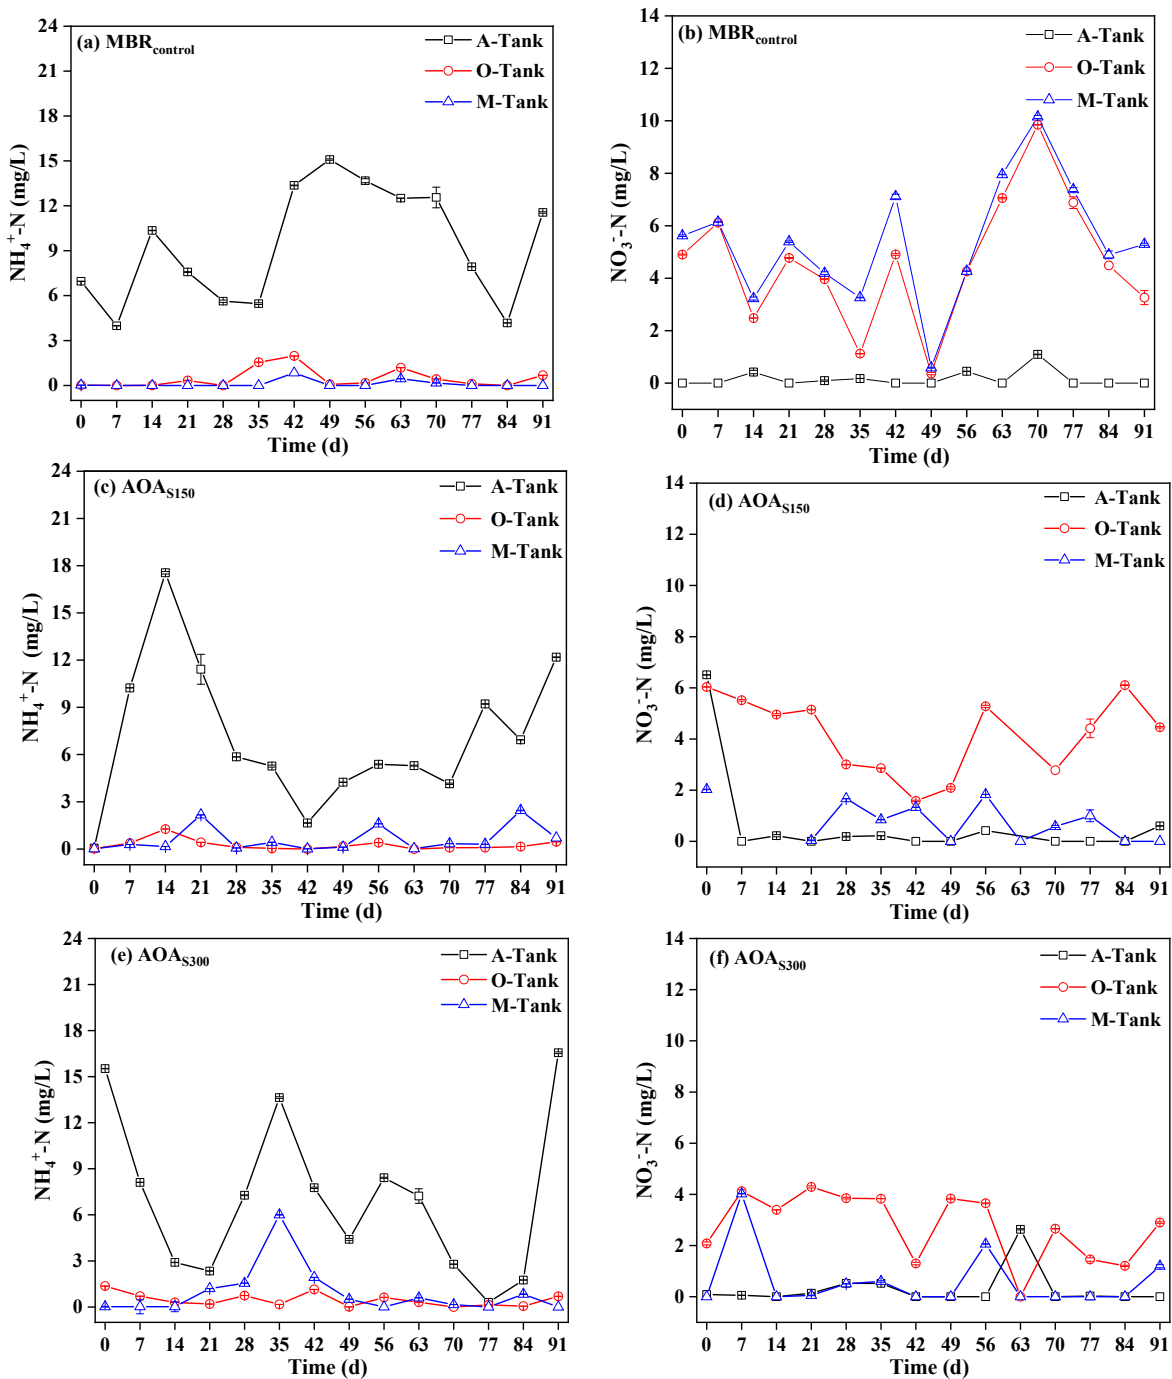

**Figure S2.** The temporal variations in  $\text{NH}_4^+\text{-N}$  and  $\text{NO}_3^-\text{-N}$  concentrations in different tanks of three bioreactors.

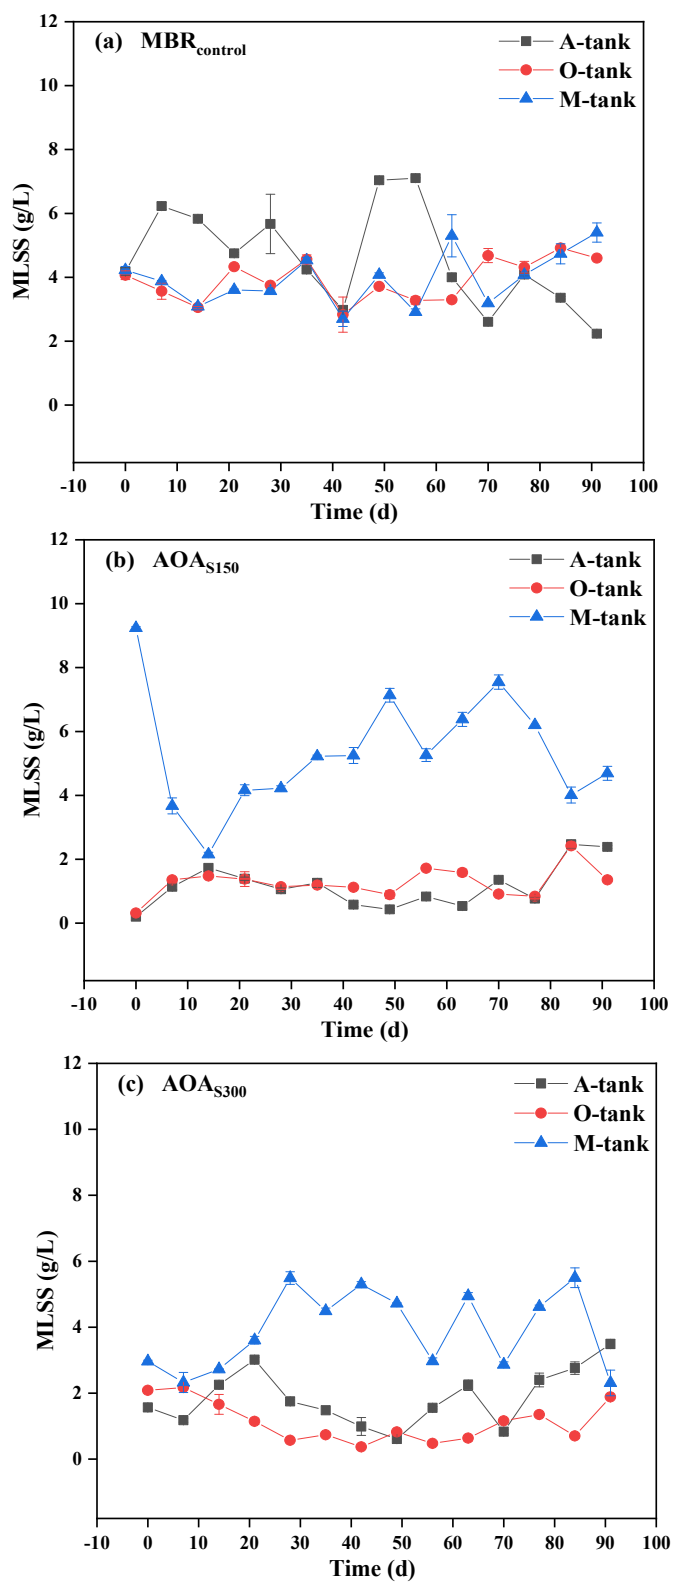

**Figure S3.** The changes of MLSS concentration in different tanks of three bioreactors.

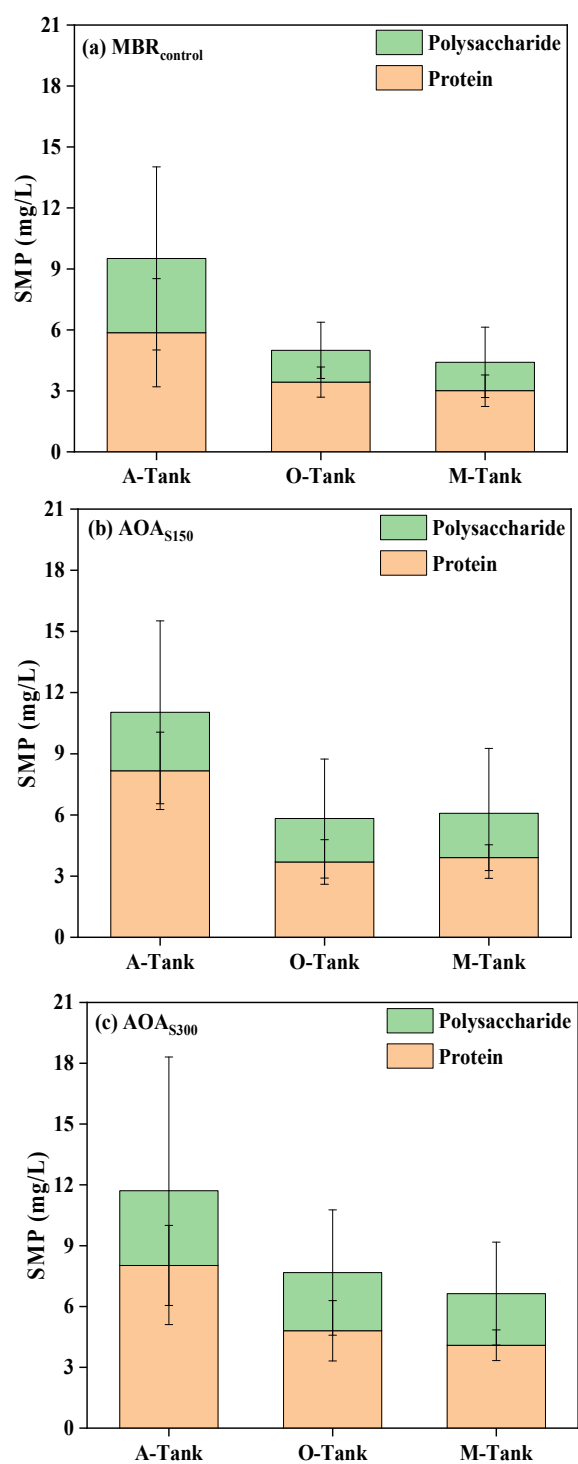

**Figure S4.** The average polysaccharide and protein in SMP in different tanks of MBR<sub>control</sub> (a), AOA<sub>S150</sub> (b), and AOA<sub>S300</sub> (c).



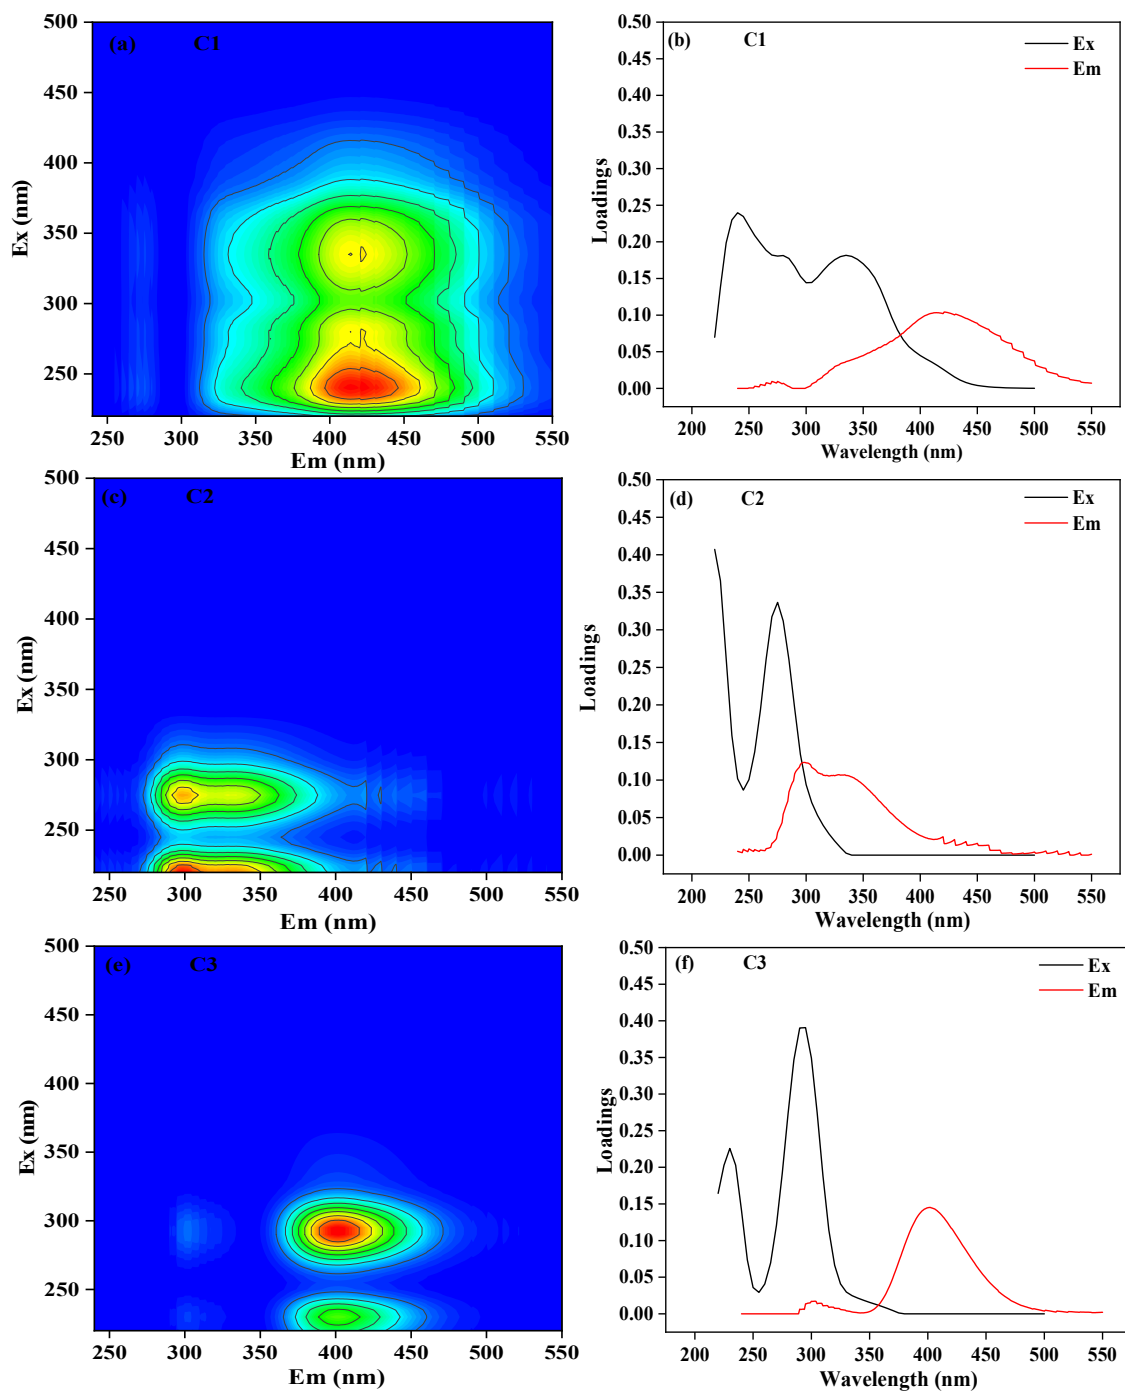

Figure S5. EEM-PARAFAC components, humic-like (C1), tryptophan-like (C2), and fulvic-like (C3).

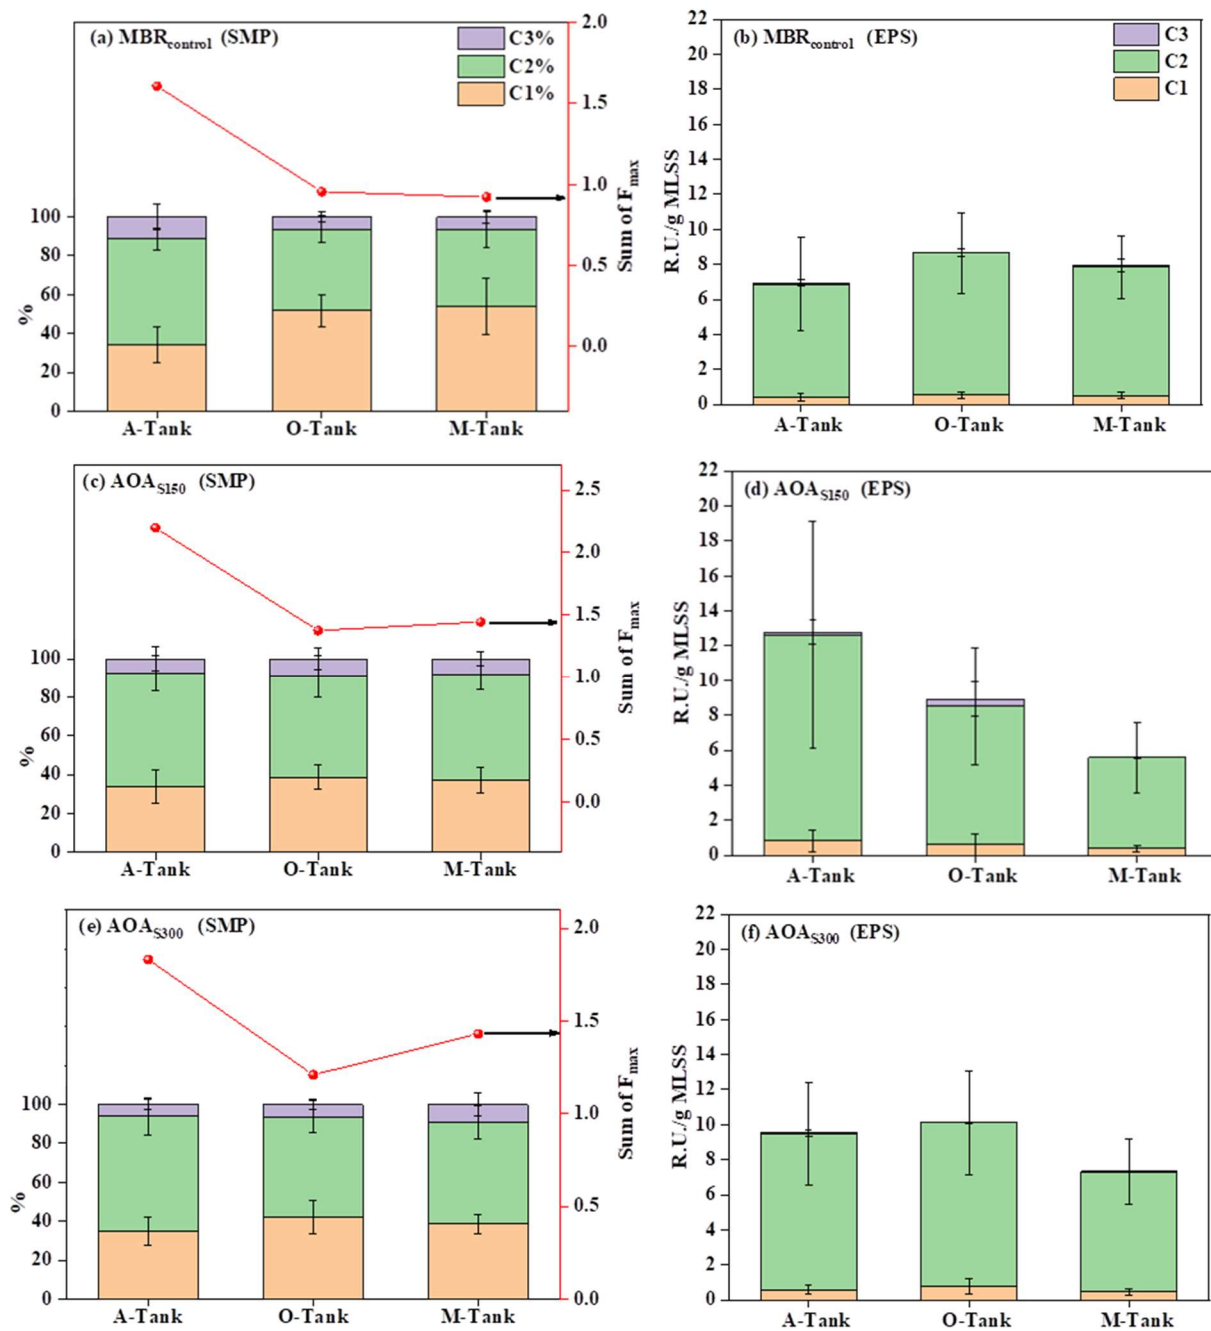

**Figure S6.** The average distribution of EEM-PARAFAC components and sum of  $F_{max}$  (C1+C2+C3) in SMP and EPS of different tanks in MBR<sub>control</sub> (a and b), AOA<sub>S150</sub> (c and d), and AOA<sub>S300</sub> (e and f).

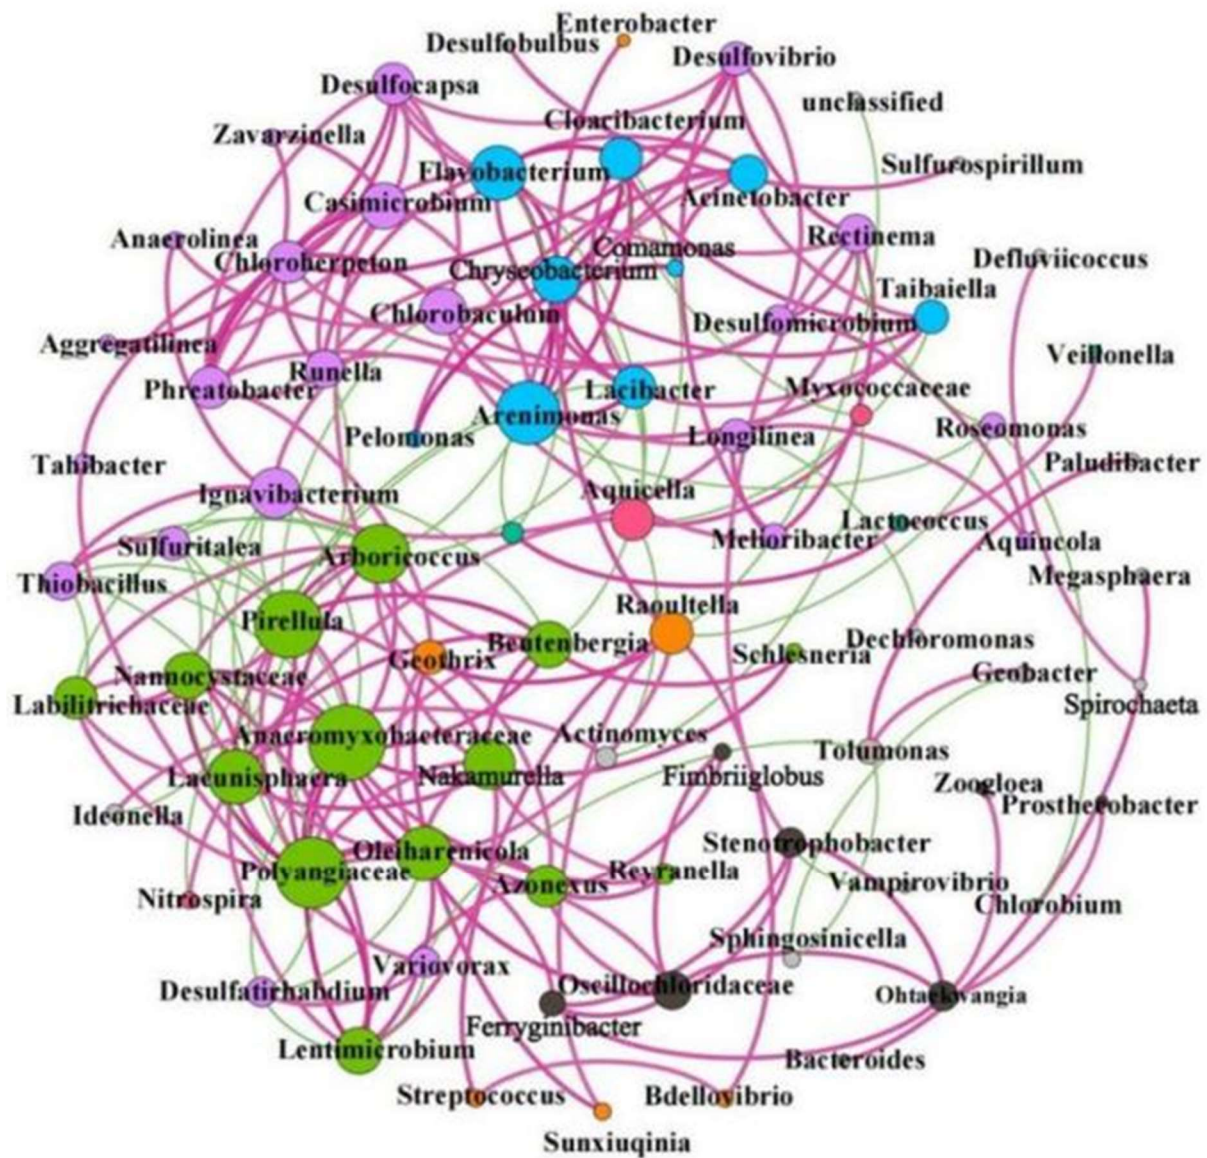

Figure S7. The network analysis among functional microorganisms in three bioreactors.

## References

1. Maqbool, T., Li, C., Qin, Y., Zhang, J., Asif, M. B., Zhang, Z. . A year-long cyclic pattern of dissolved organic matter in the tap water of a metropolitan city revealed by fluorescence spectroscopy. *Sci. Total Environ.* **2021**, 771, 144850. <https://doi.org/10.1016/j.scitotenv.2020.144850>
2. Huang, M., Li, Z., Huang, B., Luo, N., Zhang, Q., Zhai, X., Zeng, G. Investigating binding characteristics of cadmium and copper to DOM derived from compost and rice straw using EEM-PARAFAC combined with two-dimensional FTIR correlation analyses. *J. Hazard. Mater.* **2018**, 344, 539-548. <https://doi.org/10.1016/j.jhazmat.2017.10.022>
3. Stedmon, C. A., Bro, R. Characterizing dissolved organic matter fluorescence with parallel factor analysis: a tutorial. *Limnol. Oceanogr.-Meth.* **2008**, 6(11), 572-579. <https://doi.org/10.4319/lom.2008.6.572>
4. Rodríguez-Vidal, F. J., García-Valverde, M., Ortega-Azabache, B., González-Martínez, Á., Bellido-Fernández, A. Characterization of urban and industrial wastewaters using excitation-emission matrix (EEM) fluorescence: Searching for specific fingerprints. *J. Environ. Manage.* **2020**, 263, 110396. <https://doi.org/10.1016/j.jenvman.2020.110396>
